# Supplementary material
Source: MDPI journal article supplement (https://www.mdpi.com/2227-9717/10/12/2704)
Supplement: s1 [file s1]

# Optimization of Grinding Process of Sunflower Meal for Obtaining Protein-Enriched Fractions

Strahinja Vidosavljević <sup>1,\*</sup>, Nemanja Bojanić <sup>2</sup>, Petar Ilić <sup>1</sup>, Dušan Rakić <sup>2</sup>, Olivera Đuragić <sup>1</sup>, Vojislav Banjac <sup>1</sup> and Aleksandar Fištes <sup>2</sup>

<sup>1</sup> Institute of Food Technology, University of Novi Sad, Boulevard cara Lazara 1, 21000 Novi Sad, Serbia

<sup>2</sup> Faculty of Technology, University of Novi Sad, Boulevard cara Lazara 1, 21000 Novi Sad, Serbia

\* Correspondence: strahinja.vidosavljevic@fins.uns.ac.rs

**Table S1.** ANOVA table for protein content (R1).

| R1             | Sum of Squares | df | Mean Square | F-value | p-value |
|----------------|----------------|----|-------------|---------|---------|
| Model          | 40.81          | 9  | 4.53        | 3.39    | 0.0133  |
| A-SOD          | 20.35          | 1  | 20.35       | 15.19   | 0.0011  |
| B-Roll gap     | 5.82           | 1  | 5.82        | 4.35    | 0.0516  |
| C-Feed rate    | 5.94           | 1  | 5.94        | 4.44    | 0.0495  |
| D-Roll speed   | 0.5253         | 1  | 0.5253      | 0.3922  | 0.539   |
| AB             | 1.14           | 1  | 1.14        | 0.8491  | 0.369   |
| AC             | 2.4            | 1  | 2.4         | 1.79    | 0.1976  |
| AD             | 0.9929         | 1  | 0.9929      | 0.7413  | 0.4006  |
| BC             | 2.03           | 1  | 2.03        | 1.51    | 0.2346  |
| D <sup>2</sup> | 1.62           | 1  | 1.62        | 1.21    | 0.2865  |
| Residual       | 24.11          | 18 | 1.34        |         |         |
| Lack of Fit    | 20.56          | 15 | 1.37        | 1.16    | 0.5178  |
| Pure Error     | 3.54           | 3  | 1.18        |         |         |
| Cor Total      | 64.92          | 27 |             |         |         |

**Table S2.** ANOVA table for fraction yield (R2).

| R2             | Sum of Squares | df | Mean Square | F-value | p-value  |
|----------------|----------------|----|-------------|---------|----------|
| Model          | 486.97         | 10 | 48.7        | 30.49   | < 0.0001 |
| A-SOD          | 347.06         | 1  | 347.06      | 217.32  | < 0.0001 |
| B-Roll gap     | 54.06          | 1  | 54.06       | 33.85   | < 0.0001 |
| C-Feed rate    | 34.07          | 1  | 34.07       | 21.33   | 0.0002   |
| D-Roll speed   | 0.3158         | 1  | 0.3158      | 0.1977  | 0.6622   |
| AB             | 7.92           | 1  | 7.92        | 4.96    | 0.0398   |
| AC             | 11.15          | 1  | 11.15       | 6.98    | 0.0171   |
| BD             | 4.76           | 1  | 4.76        | 2.98    | 0.1023   |
| CD             | 17.91          | 1  | 17.91       | 11.22   | 0.0038   |
| A <sup>2</sup> | 9.33           | 1  | 9.33        | 5.84    | 0.0271   |
| D <sup>2</sup> | 2.73           | 1  | 2.73        | 1.71    | 0.2086   |
| Residual       | 27.15          | 17 | 1.6         |         |          |
| Lack of Fit    | 20.41          | 14 | 1.46        | 0.649   | 0.7522   |
| Pure Error     | 6.74           | 3  | 2.25        |         |          |
| Cor Total      | 514.12         | 27 |             |         |          |

**Table S3.** ANOVA table for grinding energy consumption (R3).

| <b>R3</b>      | <b>Sum of Squares</b> | <b>df</b> | <b>Mean Square</b> | <b>F-value</b> | <b>p-value</b> |
|----------------|-----------------------|-----------|--------------------|----------------|----------------|
| Model          | 94.89                 | 11        | 8.63               | 27.66          | < 0.0001       |
| A-SOD          | 0.6328                | 1         | 0.6328             | 2.03           | 0.1735         |
| B-Roll gap     | 81.6                  | 1         | 81.6               | 261.66         | < 0.0001       |
| C-Feed rate    | 1.18                  | 1         | 1.18               | 3.77           | 0.0701         |
| D-Roll speed   | 0.3896                | 1         | 0.3896             | 1.25           | 0.2802         |
| AB             | 0.2508                | 1         | 0.2508             | 0.8042         | 0.3831         |
| AC             | 0.281                 | 1         | 0.281              | 0.9011         | 0.3566         |
| BC             | 2.92                  | 1         | 2.92               | 9.37           | 0.0075         |
| CD             | 0.5898                | 1         | 0.5898             | 1.89           | 0.188          |
| A <sup>2</sup> | 3.33                  | 1         | 3.33               | 10.67          | 0.0049         |
| B <sup>2</sup> | 0.6368                | 1         | 0.6368             | 2.04           | 0.1723         |
| D <sup>2</sup> | 1.42                  | 1         | 1.42               | 4.55           | 0.0487         |
| Residual       | 4.99                  | 16        | 0.3119             |                |                |
| Lack of Fit    | 3.77                  | 13        | 0.2899             | 0.7126         | 0.7137         |
| Pure Error     | 1.22                  | 3         | 0.4069             |                |                |
| Cor Total      | 99.88                 | 27        |                    |                |                |
